# Supplementary material for: Metallochaperone-like genes in Arabidopsis thaliana
Source: Royal Society of Chemistry journal article supplement (doi:10.1039/c003484c), 2010-01-01
Supplement: c003484c.pdf [file c003484c.pdf]

## Metallochaperone-like genes in *Arabidopsis thaliana*

Muhammad Tehseen, Narelle Cairns, Sarah Sherson and Christopher S Cobbett\*

Department of Genetics, University of Melbourne, Parkville, Victoria 3010, Australia

\*Corresponding author: Tel: +61 3 8344 6246

Fax: +61 3 8344 5139

E.mail: ccobbett@unimelb.edu.au

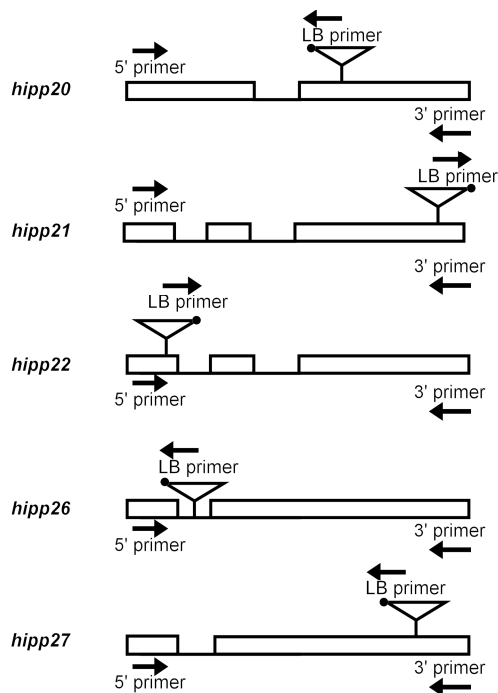

### Supp Figure 1: Schematic representation of intron/exon boundaries and the location of T-DNAs in *hipp20*, *hipp21*, *hipp22*, *hipp26* and *hipp27*.

A schematic representation of the predicted transcribed regions of *hipp20*, *hipp21*, *hipp22*, *hipp26*, *hipp27*, showing approximate locations of exons (white boxes) and introns (black lines). ▽ Indicate the T-DNA insertion and • indicates the Left Border of the T-DNA. Arrows show the location and orientation of primers used for genotyping in each T-DNA mutant allele along with corresponding WT.

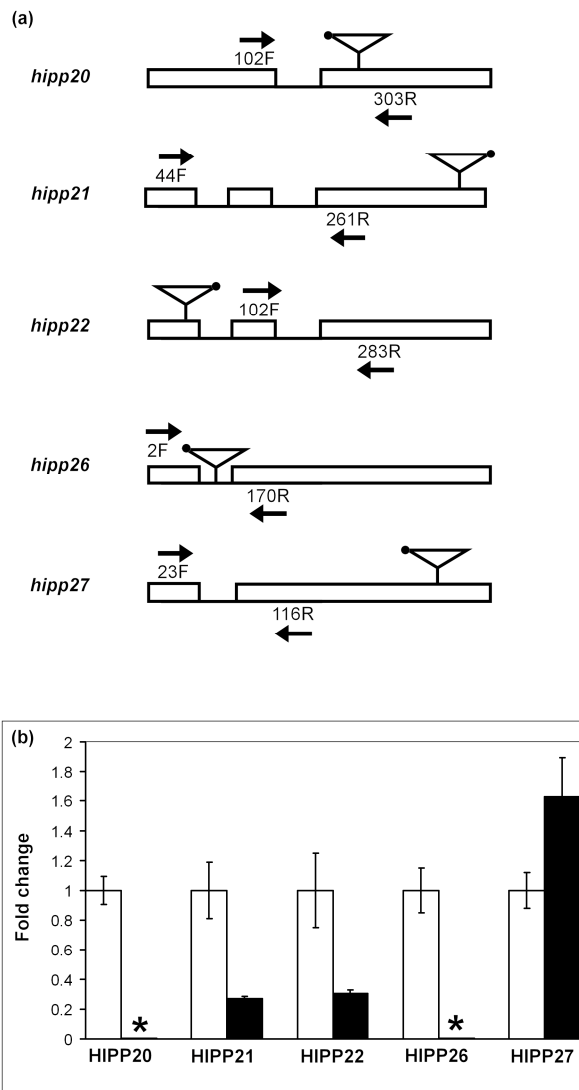

**Supp Figure 2: Relative amount of transcript of mutant alleles in the *hipp20*, *hipp21*, *hipp22*, *hipp26* and *hipp27* mutants measured by RT-PCR. (a)** A schematic outline of primer sets used in quantitative RT-PCR. Arrows denote the direction and position of PCR primer. **(b)** Relative amount of transcript of each *hipp* mutant allele (black bars) measured relative to wild-type (white bars) and normalised to *ACT2* expression. The graph represents the mean relative expression  $\pm$  SE of three independent biological samples of each mutant each measured in quadruplicate.

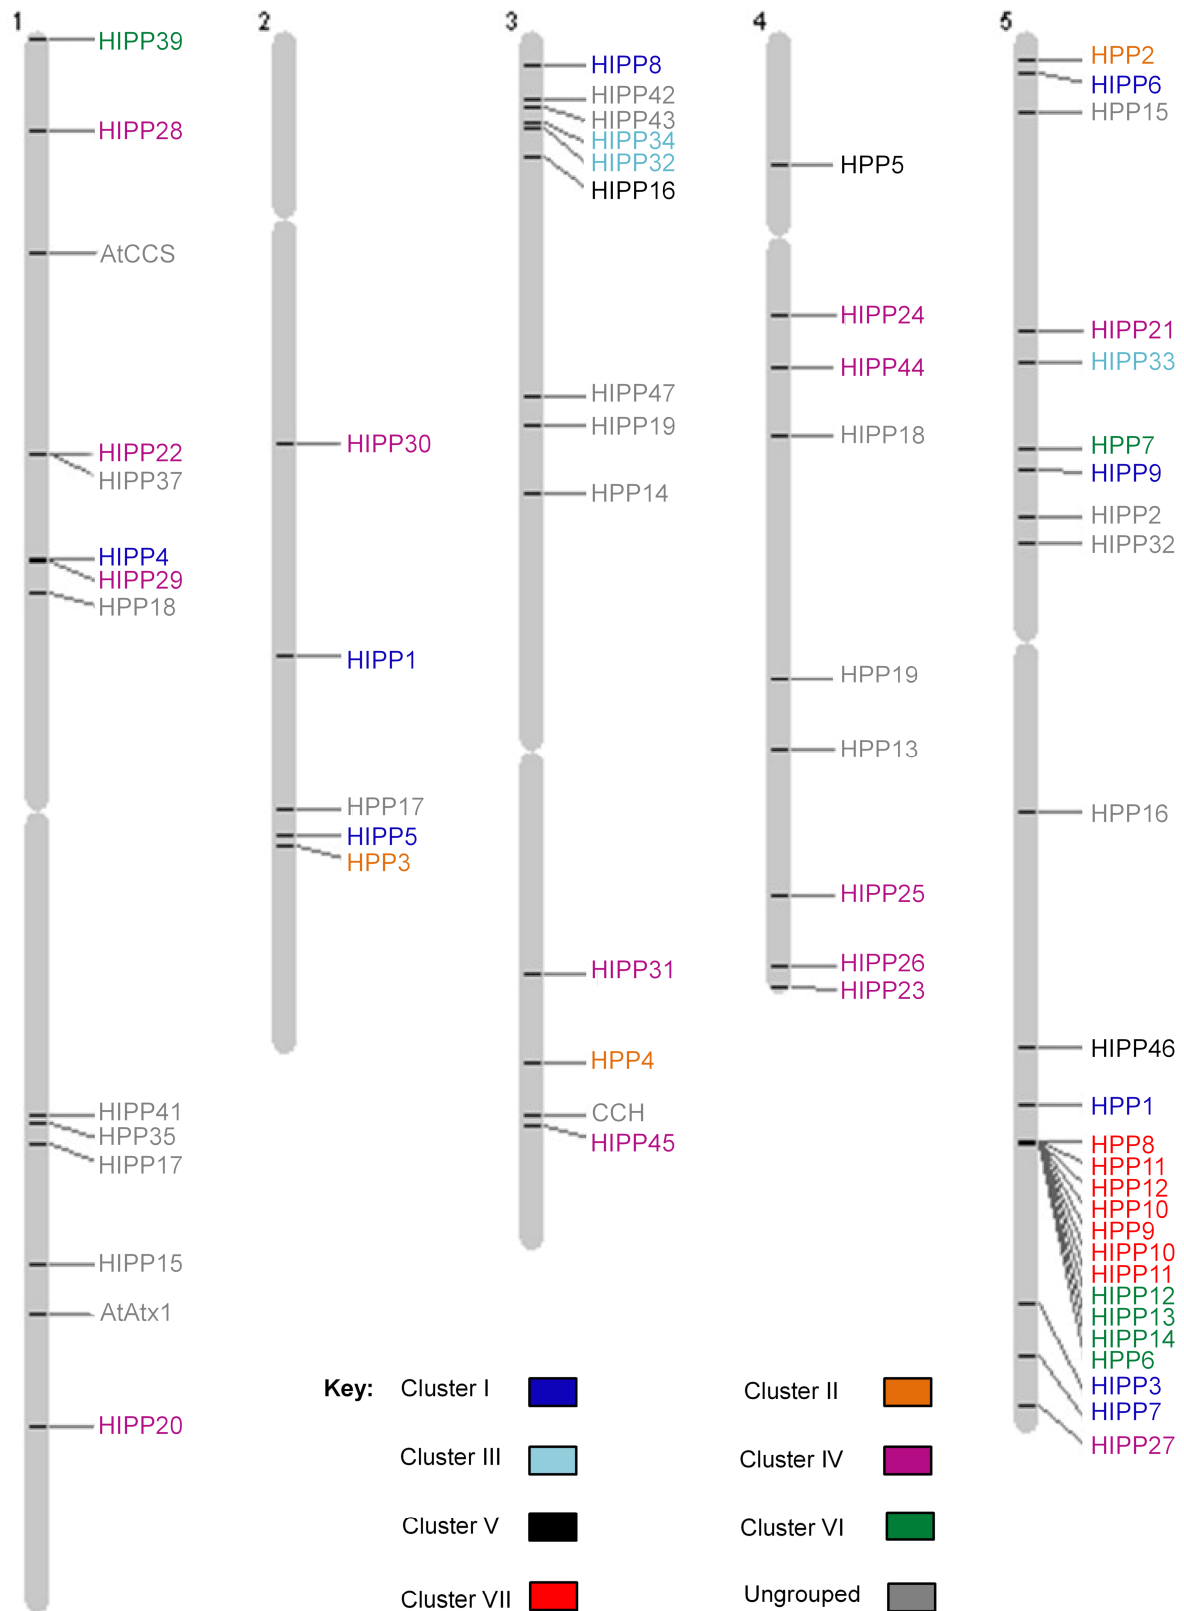

**Supp Figure 3:** The relative locations of the *Arabidopsis* HIPP and HPP genes were mapped on to the five *Arabidopsis* chromosomes using the Chromosome Map Tool (<http://www.Arabidopsis.org/jsp/ChromosomeMap/tool.jsp>) at TAIR. Members of each cluster are shown by different colour as shown in the Key.

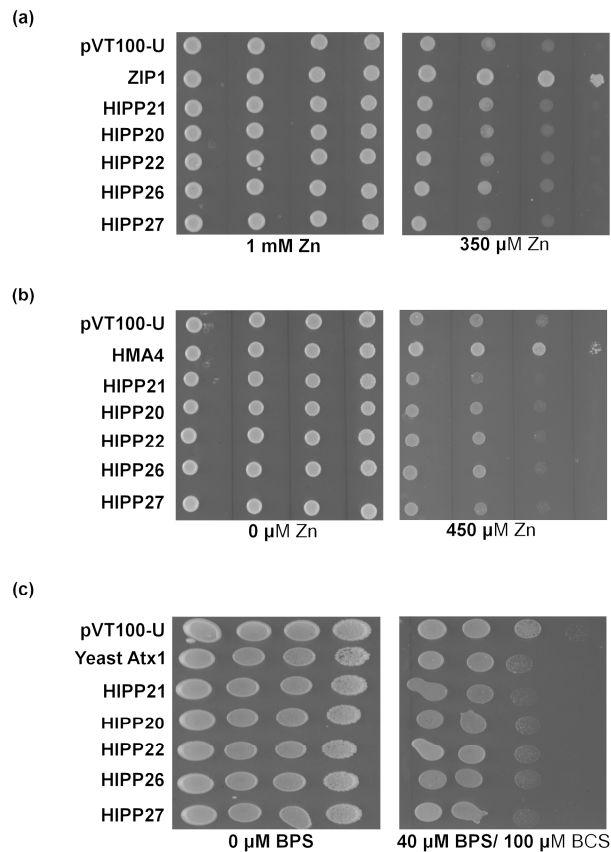

**Supp Figure 4: Heterologous expression of *HIPP20*, *HIPP21*, *HIPP22*, *HIPP26* and *HIPP27* cDNAs in *zrc1cot1* and *zrt1zrt2* and  $\Delta$ *atx1*.** (a) *zrt1zrt2* (Zn-dependent) expressing HIPPs, ZIP1 (positive control) and vector-only (pVT100-U) after 4 d growth at 30°C on LZM-U media with different concentrations of Zn. (b) *zrc1cot1* (Zn-sensitive) expressing HIPPs, AtHMA4 (positive control) and vector-only (pVT100-U) after 4 d growth at 30°C on SD-U media with and without Zn. (c) Yeast  $\Delta$ *atx1* cells transformed with HIPPs, Yeast Atx1 (positive control) and vector-only (pVT100-U) were assayed for growth on SD/-U containing 30-100  $\mu$ M BPS and 100  $\mu$ M BCS (BPS/BCS) at 30°C.

Cells were spotted as one-tenth serial dilutions starting at  $A_{600 \text{ nm}}$  1.6.

**Supp Table 1: The *Arabidopsis* HIPP and HPP Proteins**

| Chromosomal locus | Number of introns | Protein details       |                       |                                        |               |                                                 |                                     |       |
|-------------------|-------------------|-----------------------|-----------------------|----------------------------------------|---------------|-------------------------------------------------|-------------------------------------|-------|
|                   |                   | Number of CXXC motifs | Number of HMA domains | Putative <sup>a</sup> prenylation site | Length (a. a) | $\beta\alpha\beta\alpha\beta$ <sup>b</sup> Fold | Predicted <sup>c</sup> Localization |       |
| <b>I</b>          |                   |                       |                       |                                        |               |                                                 |                                     |       |
| At5g24580         | HIPP9             | 3                     | 2                     | 2                                      | Yes           | 318                                             | 1) Yes 2) ?                         | ?     |
| At1g29000         | HIPP4             | 3                     | 2                     | 2                                      | Yes           | 287                                             | 1) ? 2) ?                           | Cyt   |
| At5g50740         | <b>HPP1</b>       | 4                     | 2                     | 2                                      | No            | 290                                             | 1) Yes 2) Yes                       | ?     |
| At5g63530         | HIPP7             | 4                     | 2                     | 2                                      | Yes           | 355                                             | 1) Yes 2) Yes                       | ?     |
| At3g02960         | HIPP8             | 4                     | 2                     | 2                                      | Yes           | 246                                             | 1) Yes 2) ?                         | ?     |
| At2g28090         | HIPP1             | 3                     | 2                     | 2                                      | Yes           | 245                                             | 1) ? 2) Yes                         | Cyt   |
| At5g60800         | HIPP3             | 4                     | 2                     | 2                                      | Yes           | 283                                             | 1) Yes 2) Yes                       | ?     |
| At2g36950         | HIPP5             | 2                     | 2                     | 2                                      | Yes           | 386                                             | 1) Yes 2) ?                         | ?     |
| At5g03380         | HIPP6             | 4                     | 2                     | 2                                      | Yes           | 392                                             | 1) Yes 2) Yes                       | Cyt   |
| <b>II</b>         |                   |                       |                       |                                        |               |                                                 |                                     |       |
| At5g02600         | <b>HPP2</b>       | 2                     | 1                     | 1                                      | No            | 319                                             | Yes                                 | Plast |
| At2g37390         | <b>HPP3</b>       | 2                     | 1                     | 1                                      | No            | 259                                             | Yes                                 | Mito  |
| At3g53530         | <b>HPP4</b>       | 2                     | 1                     | 1                                      | No            | 248                                             | Yes                                 | ?     |
| <b>III</b>        |                   |                       |                       |                                        |               |                                                 |                                     |       |
| At3g05220         | HIPP34            | 2                     | 1                     | 1                                      | Yes           | 577                                             | Yes                                 | Mito  |
| At5g19090         | HIPP33            | 2                     | 1                     | 1                                      | Yes           | 587                                             | Yes                                 | ?     |
| At3g06130         | HIPP32            | 2                     | 1                     | 1                                      | Yes           | 473                                             | Yes                                 | ?     |
| <b>IV</b>         |                   |                       |                       |                                        |               |                                                 |                                     |       |
| At4g38580         | HIPP26            | 1                     | 1                     | 1                                      | Yes           | 153                                             | Yes                                 | Cyt   |
| At4g35060         | HIPP25            | 1                     | 1                     | 1                                      | Yes           | 153                                             | Yes                                 | ?     |

**a:** Presence or absence of isoprenylation sequence at the C-terminus of the HIPP/HPPs. The predictions were conducted through PrePS-Prenylation Prediction Suite (<http://mendel.imp.ac.at/sat/PrePS/index.html>) (Maurer-Stroh and Eisenhaber, 2005).

**b:**  $\beta\alpha\beta\alpha\beta$ -fold structure was determined by using Conserved Domain Database (CDD) (<http://www.ncbi.nlm.nih.gov/Structure/cdd/cdd.shtml>) (Marchler-Bauer et al., 2008). Description abbreviations: Yes, proteins predicted to contain the  $\beta\alpha\beta\alpha\beta$ -fold and ? programme fails to predict. Where the protein has two HMA domains (1) indicates first domain and (2) indicates second.

**c:** Seven different localisation prediction programmes were used (iPSORT, MitoPred, LOctree, PeroxiP, Predator, SubLoc and TargetP). Proteins with three or more programmes predicting the same localisation are marked: Cyt, Cytoplasm; Plast, Plastid; Mito, Mitochondrion. ? three or more prediction programmes fail to reach the consensus.

**Table 4.1 Continued**

| Chromosomal locus |        | Number of introns | Protein details       |                       |                           |               |                                    | Predicted Localization |
|-------------------|--------|-------------------|-----------------------|-----------------------|---------------------------|---------------|------------------------------------|------------------------|
|                   |        |                   | Number of CXXC motifs | Number of HMA domains | Putative prenylation site | Length (a. a) | $\beta\alpha\beta\alpha\beta$ Fold |                        |
| At5g66110         | HIPP27 | 1                 | 1                     | 1                     | Yes                       | 145           | Yes                                | ?                      |
| At1g71050         | HIPP20 | 1                 | 1                     | 1                     | Yes                       | 152           | Yes                                | Cyt                    |
| At4g08570         | HIPP24 | 1                 | 1                     | 1                     | Yes                       | 150           | Yes                                | ?                      |
| At4g39700         | HIPP23 | 1                 | 1                     | 1                     | Yes                       | 158           | Yes                                | ?                      |
| At1g06330         | HIPP28 | 1                 | 1                     | 1                     | Yes                       | 158           | Yes                                | ?                      |
| At1g29100         | HIPP29 | 1                 | 1                     | 1                     | Yes                       | 141           | Yes                                | ?                      |
| At5g17450         | HIPP21 | 2                 | 1                     | 1                     | Yes                       | 149           | Yes                                | ?                      |
| At1g22990         | HIPP22 | 2                 | 1                     | 1                     | Yes                       | 152           | Yes                                | Cyt                    |
| At3g48970         | HIPP31 | 2                 | 1                     | 1                     | Yes                       | 140           | ?                                  | ?                      |
| At3g56891         | HIPP45 | 2                 | 1                     | 1                     | Yes                       | 166           | Yes                                | ?                      |
| At2g18196         | HIPP30 | 2                 | 1                     | 1                     | Yes                       | 142           | Yes                                | Cyt                    |
| At4g10465         | HIPP44 | 2                 | 1                     | 1                     | Yes                       | 183           | Yes                                | ?                      |
| <b>V</b>          |        |                   |                       |                       |                           |               |                                    |                        |
| At5g48290         | HIPP46 | 2                 | 0                     | 1                     | Yes                       | 181           | ?                                  | ?                      |
| At3g07600         | HIPP16 | 2                 | 0                     | 1                     | Yes                       | 157           | ?                                  | ?                      |
| At4g05030         | HPP5   | 3                 | 1                     | 1                     | No                        | 110           | ?                                  | Mito                   |
| <b>VI</b>         |        |                   |                       |                       |                           |               |                                    |                        |
| At1g01490         | HIPP39 | 2                 | 0                     | 1                     | Yes                       | 177           | Yes                                | ?                      |
| At5g23760         | HPP7   | 2                 | 0                     | 1                     | No                        | 103           | ?                                  | ?                      |
| At5g52770         | HPP6   | 1                 | 0                     | 1                     | No                        | 111           | Yes                                | ?                      |
| At5g52750         | HIPP13 | 2                 | 0                     | 1                     | Yes                       | 139           | ?                                  | ?                      |
| At5g52760         | HIPP14 | 2                 | 0                     | 1                     | Yes                       | 126           | ?                                  | ?                      |
| At5g52740         | HIPP12 | 2                 | 0                     | 1                     | Yes                       | 118           | Yes                                | ?                      |
| <b>VII</b>        |        |                   |                       |                       |                           |               |                                    |                        |
| At5g52720         | HIPP10 | 2                 | 0                     | 1                     | Yes                       | 111           | Yes                                | ?                      |
| At5g52730         | HIPP11 | 1                 | 0                     | 1                     | Yes                       | 185           | Yes                                | ?                      |
| At5g52670         | HPP8   | 2                 | 0                     | 1                     | No                        | 103           | Yes                                | Cyt                    |

**Table 4.1 Continued**

| Chromosomal locus |        | Number of introns | Protein details       |                       |                           |               |               | Predicted Localization |
|-------------------|--------|-------------------|-----------------------|-----------------------|---------------------------|---------------|---------------|------------------------|
|                   |        |                   | Number of CXXC motifs | Number of HMA domains | Putative prenylation site | Length (a. a) | βββββ Fold    |                        |
| At5g52710         | HPP9   | 5                 | 0                     | 2                     | No                        | 451           | 1) ? 2) ?     | ?                      |
| At5g52700         | HPP10  | 3                 | 0                     | 2                     | No                        | 370           | 1) ? 2) ?     | ?                      |
| At5g52680         | HPP11  | 3                 | 0                     | 2                     | No                        | 238           | 1) ? 2) Yes   | ?                      |
| At5g52690         | HPP12  | 4                 | 0                     | 2                     | No                        | 177           | 1) Yes 2) Yes | Cyt                    |
| <b>Ungrouped</b>  |        |                   |                       |                       |                           |               |               |                        |
| At3g24450         | HPP14  | 2                 | 0                     | 1                     | No                        | 140           | Yes           | ?                      |
| At1g12520         | AtCCS  | 5                 | 1                     | 1                     | No                        | 254           | Yes           | Plast                  |
| At2g35730         | HPP17  | 2                 | 1                     | 1                     | No                        | 115           | Yes           | ?                      |
| At3g04900         | HIPP42 | 0                 | 0                     | 1                     | Yes                       | 208           | Yes           | ?                      |
| At4g23882         | HPP19  | 3                 | 1                     | 1                     | No                        | 284           | Yes           | ?                      |
| At1g30473         | HPP18  | 3                 | 1                     | 1                     | No                        | 239           | ?             | ?                      |
| At5g26690         | HIPP2  | 2                 | 1                     | 1                     | Yes                       | 114           | Yes           | ?                      |
| At1g56210         | HIPP35 | 2                 | 1                     | 1                     | Yes                       | 364           | Yes           | ?                      |
| At3g56240         | AtCCH  | 2                 | 1                     | 1                     | No                        | 121           | Yes           | Cyt                    |
| At1g66240         | AtAtx1 | 2                 | 1                     | 1                     | No                        | 106           | Yes           | Cyt                    |
| At4g27590         | HPP13  | 1                 | 0                     | 1                     | No                        | 156           | Yes           | Cyt                    |
| At5g27690         | HIPP36 | 2                 | 1                     | 1                     | Yes                       | 352           | Yes           | ?                      |
| At5g05365         | HPP15  | 2                 | 1                     | 1                     | No                        | 77            | Yes           | ?                      |
| At5g37860         | HPP16  | 2                 | 1                     | 1                     | No                        | 262           | Yes           | ?                      |
| At1g63950         | HIPP15 | 1                 | 0                     | 1                     | Yes                       | 113           | Yes           | ?                      |
| At1g23000         | HIPP37 | 2                 | 1                     | 1                     | Yes                       | 358           | Yes           | ?                      |
| At1g55780         | HIPP41 | 1                 | 0                     | 1                     | Yes                       | 133           | ?             | ?                      |
| At3g20180         | HIPP47 | 1                 | 0                     | 1                     | Yes                       | 118           | ?             | ?                      |
| At4g13380         | HIPP18 | 2                 | 0                     | 1                     | Yes                       | 195           | ?             | ?                      |
| At1g57780         | HIPP17 | 4                 | 0                     | 2                     | Yes                       | 264           | 1) ? 2) ?     | ?                      |
| At3g21490         | HIPP19 | 2                 | 1                     | 1                     | Yes                       | 136           | Yes           | ?                      |
| At3g05920         | HIPP43 | 2                 | 1                     | 1                     | Yes                       | 126           | ?             | ?                      |

**Supp Table 2: hipp mutant alleles identified in this study**

| Allele <sup>a</sup> | Ecotype <sup>b</sup> | Position <sup>c</sup> | Gene T-DNA boundary sequence <sup>d</sup>                         |
|---------------------|----------------------|-----------------------|-------------------------------------------------------------------|
| <i>hipp20</i>       | Col                  | exon 2 (391)          | AGT GGA TAC GTG GAA CCA   ttgacgcttagacaac<br>S G Y V E P         |
| <i>hipp21</i>       | Col                  | exon 3 (1251)         | gttgtctaagcgtcaa   AC ATC CGT AAT CCC ACT CAA<br>I R N P T Q      |
| <i>hipp22</i>       | Col                  | exon 1 (53)           | gaaaaaagaacatcac   A ATA CGA AAA CGG AAG AAA CGT<br>I R K R K K R |
| <i>hipp26</i>       | Ws                   | intron 1 (208)        | <u>GTAGAAACTAGCTTCGAT</u>   tgtactgaatcggattttca                  |
| <i>hipp27</i>       | Ler                  | exon 2 (356)          | CTG TGG CCT TAC GTA CCT TA   catagggatgaaaacggt<br>L T P T V P    |

<sup>a</sup>: *hipp20* (SALK\_048115), *hipp21*(SALK\_131715), *hipp22* (CS112068) and *hipp27* (CS180249) were obtained from SALK and *hipp26* (FLAG\_631G11) was obtained from INRA.

<sup>b</sup>: Ws, Wassilewskija; Col, Columbia; Ler, *Landsberg erecta*.

<sup>c</sup>: numbers indicate the base pair immediately adjacent to the left-border of the T-DNA insertion relative to the A of the predicted initiation codon of the respective gene.

<sup>d</sup>: the vertical bar identifies the boundary between gene sequence and insertion sequence; gene sequences are in upper case, intron sequences are underlined and coding sequences are translated below; insertion sequences are in lower case.
